# Supplementary material for: Diaminomaleonitrile-functionalized gelators in F−/CN− sensing, phase-selective gelation, oil spill recovery and dye removal from water
Source: Royal Society of Chemistry journal article supplement (doi:10.1039/d0nj01992e), 2020-01-01
Supplement: d0nj01992e1.pdf [file d0nj01992e1.pdf]

## Supporting Information

### Diaminomalenonitrile Functionalized Gelators in F<sup>-</sup>/CN<sup>-</sup> Sensing, Phase-Selective Gelation, Oil Spill Recovery and Dye Removal from Water

Rameez Raza, Atanu Panja and Kumaresh Ghosh\*

*Department of Chemistry, University of Kalyani, Kalyani-741235, India.*

*Email: ghosh\_k2003@yahoo.co.in; kumareshchem18@klyuniv.ac.in.*

**Table S1.** Results of gelation test for compounds **1** and **2**.

| Solvent                                       | <b>1</b>           | <b>2</b> <sup>1</sup> |
|-----------------------------------------------|--------------------|-----------------------|
| CH <sub>3</sub> OH                            | I                  | I                     |
| DMF                                           | S                  | S                     |
| CHCl <sub>3</sub>                             | S                  | S                     |
| THF                                           | S                  | S                     |
| DMSO                                          | G (17 mg/mL, 58°C) | PS                    |
| CH <sub>3</sub> CN                            | G (12 mg/mL, 56°C) | PS                    |
| Toluene                                       | G (10 mg/mL, 74°C) | PG                    |
| Benzene                                       | G (12 mg/mL, 66°C) | PG                    |
| 1,2-dichlorobenzene                           | G (25 mg/mL, 48°C) | G (42 mg/mL, 44 °C)   |
| DMSO-H <sub>2</sub> O (1:1,v/v)               | G (8 mg/mL, 66°C)  | I                     |
| DMF-H <sub>2</sub> O (1:1,v/v)                | G (7 mg/mL, 64 °C) | G (10 mg/mL, 58 °C)   |
| CH <sub>3</sub> CN-H <sub>2</sub> O (1:1,v/v) | PG                 | I                     |
| Pet ether*                                    | G (15 mg/mL, 58°C) | G (26 mg/mL, 66°C)    |
| Hexane*                                       | G (14 mg/mL, 64°C) | G (27 mg/mL, 68°C)    |
| Cyclohexane*                                  | G (23 mg/mL, 62°C) | G (32 mg/mL, 70°C)    |
| Petrol*                                       | G (14 mg/mL, 58°C) | G (24 mg/mL, 72°C)    |
| Kerosene*                                     | G (16 mg/mL, 70°C) | G (25 mg/mL, 74°C)    |
| Diesel*                                       | G (14 mg/mL, 56°C) | G (24 mg/mL, 72°C)    |
| Pump oil*                                     | G (15 mg/mL, 72°C) | G (26 mg/mL, 76°C)    |
| Silicon oil*                                  | G (13 mg/mL, 68°C) | G (28 mg/mL, 72°C)    |

S = Solution; G = Gel (mgc, T<sub>gel</sub>); I = Insoluble; PS = Partially soluble; P = Precipitation, PG = partial gel (thick material that did not stick on the top of the vial upon inversion). Gelation studies were carried out by taking upto 25 mg and 50 mg of compounds **1** and **2**, respectively in 1 ml of different solvents. Gels were primarily characterized by inversion of vial method after ~15 min of sample preparation.

\* In these solvents compounds **1** and **2** were either insoluble or partially soluble. Gelation was investigated by adding THF solution of compounds **1** and **2** to these solvents at 1:19 ratio (THF: solvent, v/v) at concentration upto 30 mg/mL. Gels were primarily characterized by inversion of vial method after ~15 min of sample preparation.

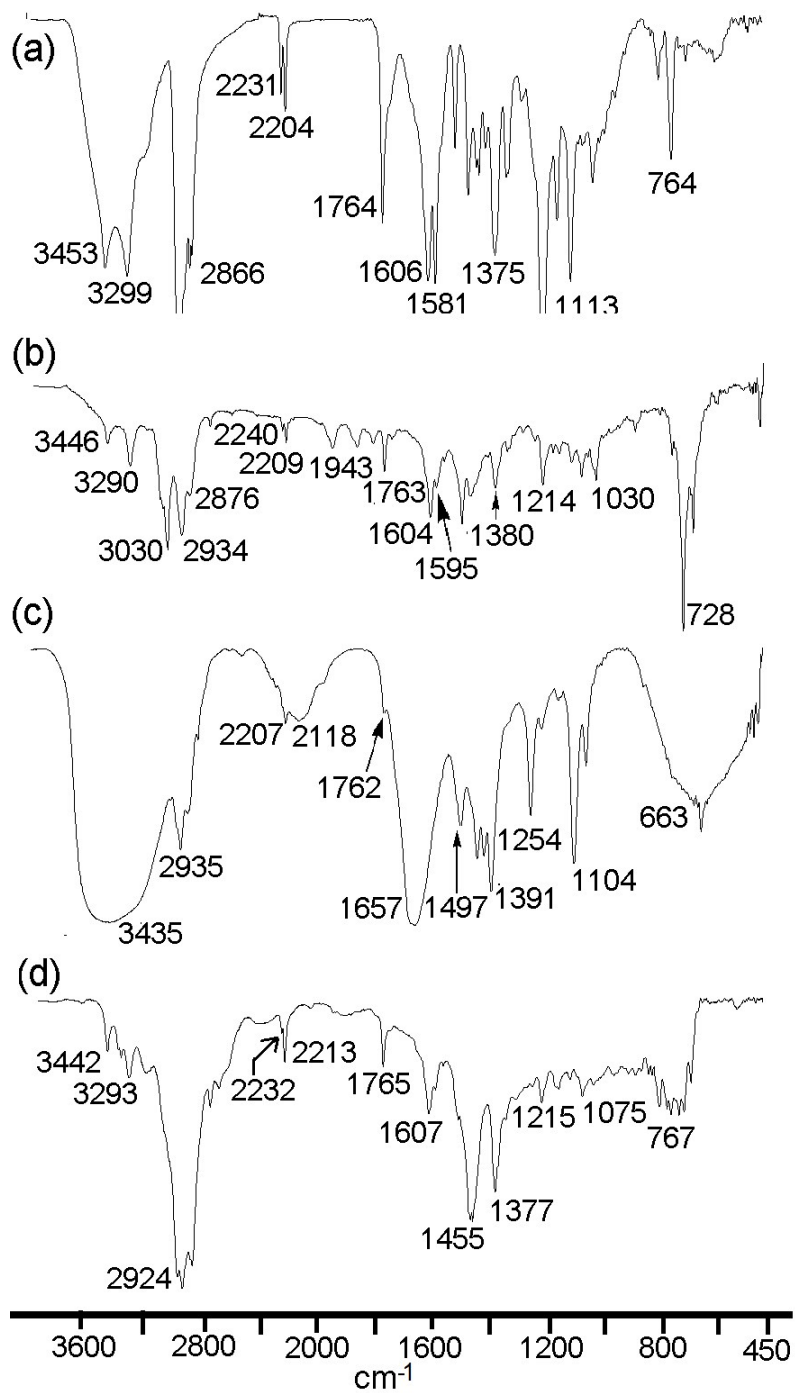

**Fig. S1.** Partial FTIR spectra of **1** in (a) amorphous state and gel states in (b) toluene, (c) DMF- $\text{H}_2\text{O}$  (1:1, v/v) and (d) Kerosene.

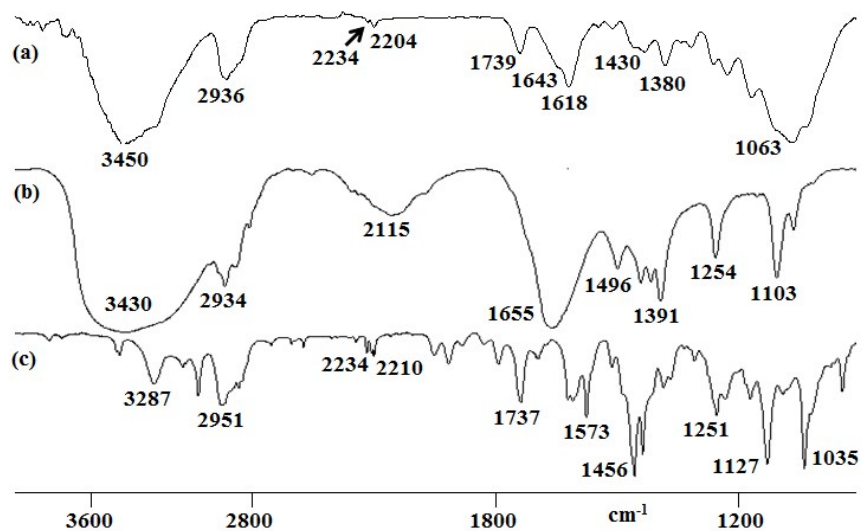

**Fig. S2.** Partial FTIR spectra of **2** in (a) amorphous state and gel states in (b) DMF- $\text{H}_2\text{O}$  (1:1, v/v) and (c) 1,2-dichlorobenzene.<sup>1</sup>

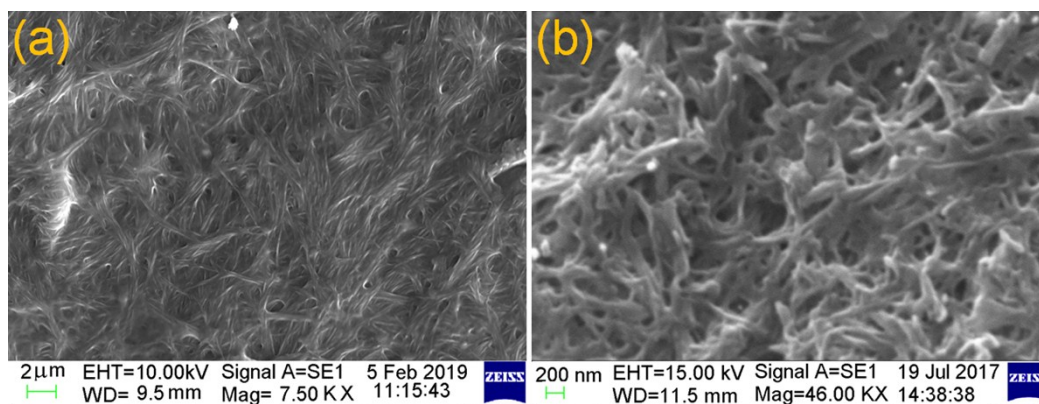

**Fig. S3.** SEM images of xerogel of (a) compound **1** and (b) compound **2** in DMF- $\text{H}_2\text{O}$  (1:1, v/v)

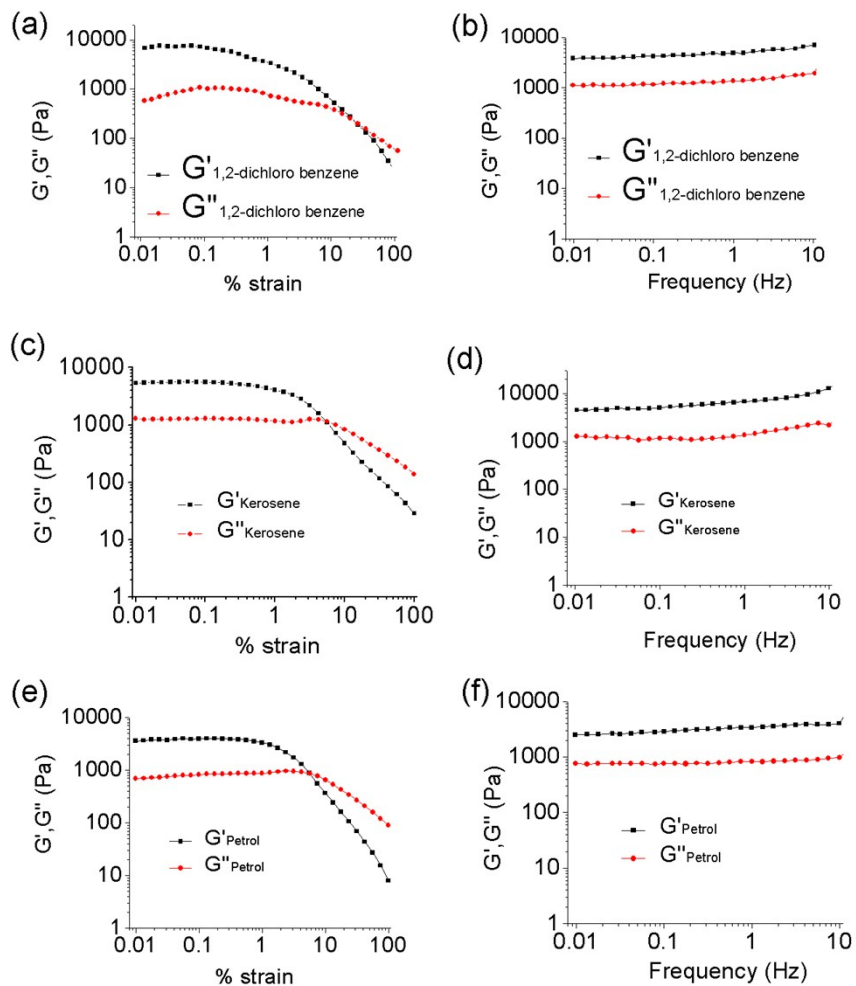

**Fig. S4.** Rheological studies of the gels of **1**; (a, c and e) amplitude sweep and (b, d and f) frequency sweep experiments. All the gels were prepared at respective mgc and the experiments were carried out at 25 °C. For all the gels, amplitude sweep experiment was carried out at constant frequency of 1Hz and frequency sweep experiment (except for the 1,2-dichlorobenzene gel) was performed at constant 0.1% strain. For the 1,2-dichlorobenzene gel, the frequency sweep experiment was carried out at constant 0.05% strain.

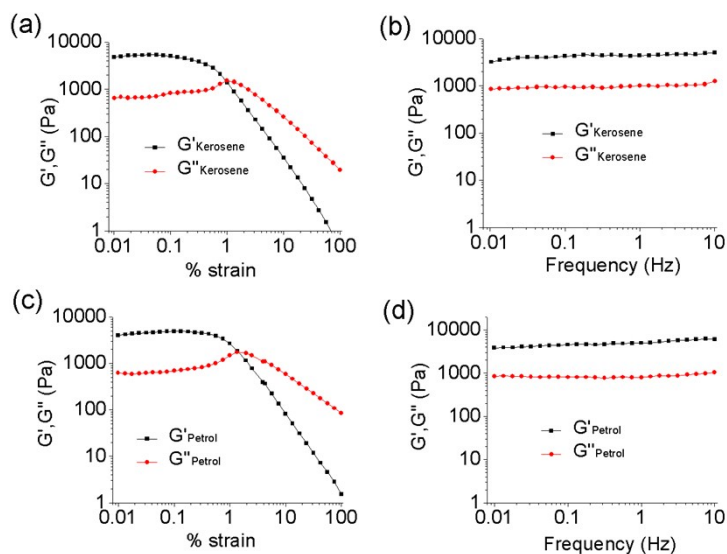

| Solvent | Critical strain (%) | Crossover (% strain) | $G'_{av}$ (Pa)* | $G''_{av}$ (Pa)* | $G'_{av}/G''_{av}$ |
|---------|---------------------|----------------------|-----------------|------------------|--------------------|
| Petrol  | 0.7                 | 1.5                  | 4883            | 849              | 5.75               |

\*  $G'_{av}$  and  $G''_{av}$  values were calculated from frequency sweep data

**Fig. S5.** Rheological studies of the gels of **2**; (a and c) amplitude sweep and (b and d) frequency sweep experiments. All the gels were prepared at respective mgc and the experiments were carried out at 25 °C. For all the gels, amplitude sweep experiment was carried out at constant frequency of 1Hz and frequency sweep experiment was performed at constant 0.1% strain.

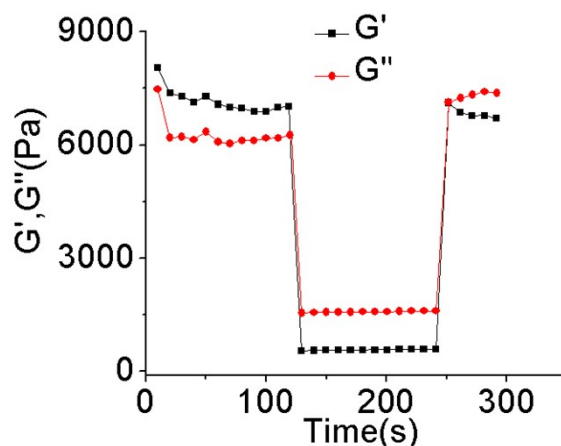

**Fig. S6.** Thixotropy-loop test via continuous step-strain measurements with the 1,2-dichlorobenzene gel of **2**. The gel was subjected to a sudden increase in strain from 0.05% (where  $G' > G''$ ) to 30% (where  $G' < G''$ ). However, when the strain was reversed from high to low strain after a recovery period of 2 min still  $G''$  was higher than  $G'$  indicating dominance of sol-type nature. The experiment was carried out at 25 °C and the gel was prepared at 1.5 wt %, (w/v).

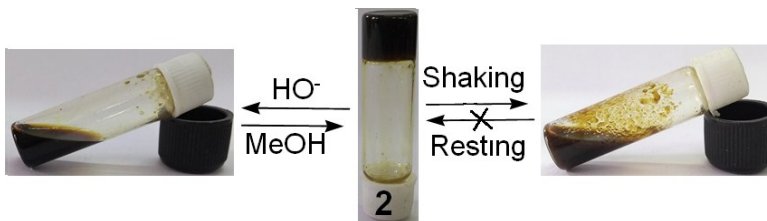

**Fig. S7.** Photograph showing the sol-gel interconversion of the 1,2-dichlorobenzene gel of **2** in the presence of different physical and chemical stimulus.

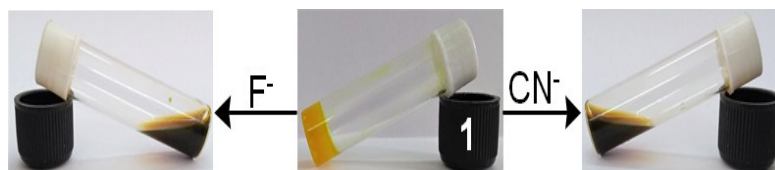

**Fig. S8.** Gel-to-sol transformation of **1** in Toluene upon addition of  $\text{CN}^-$  and  $\text{F}^-$  ions.

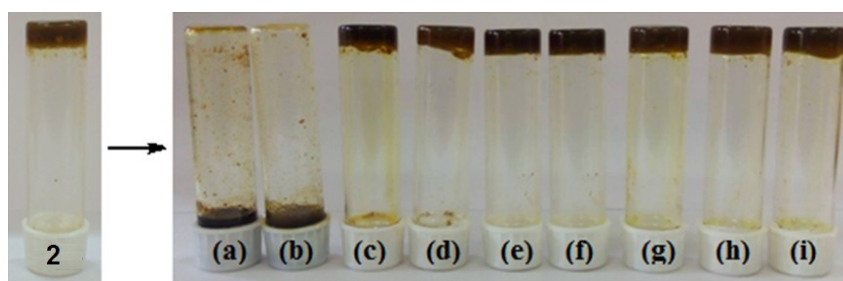

**Fig. S9.** Photograph showing the phase changes of **2** (at mgc) in 1,2-dichlorobenzene when the gels were prepared with equiv. amount of different anions (as tetrabutylammonium salts) [from left to right: (a)  $\text{CN}^-$ , (b)  $\text{F}^-$ , (c)  $\text{AcO}^-$ , (d)  $\text{H}_2\text{PO}_4^-$ , (e)  $\text{Cl}^-$ , (f)  $\text{Br}^-$ , (g)  $\text{I}^-$ , (h)  $\text{NO}_3^-$  and (i)  $\text{HSO}_4^-$ ].

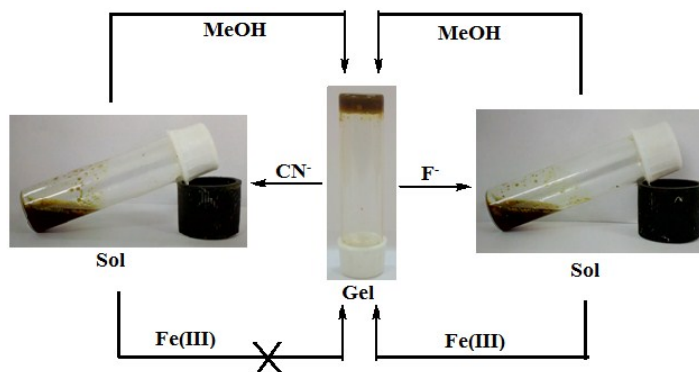

**Fig. S10.** Photograph showing the chemical reversibility of the anion induced sols of **2** in 1,2-dichlorobenzene and discrimination of  $\text{F}^-$  and  $\text{CN}^-$  ions.

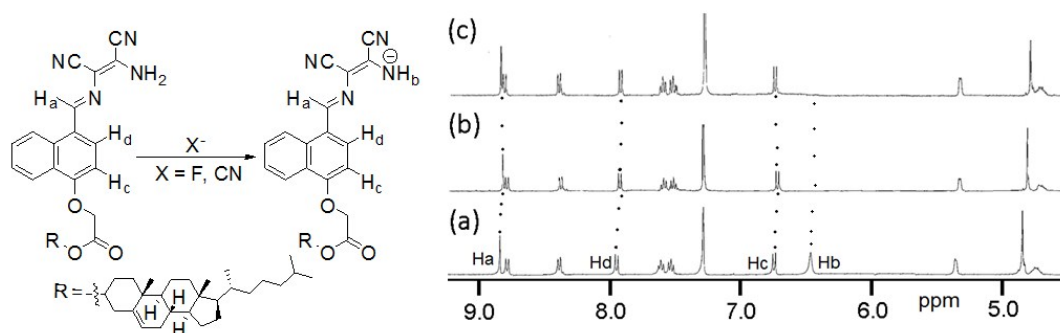

**Fig. S11.** Partial  $^1H$  NMR spectra of **1** (a) in absence and in presence of equiv. amount of (b)  $F^-$  and (c)  $CN^-$  ions in  $CDCl_3$  containing 5%  $d_6$ -DMSO.

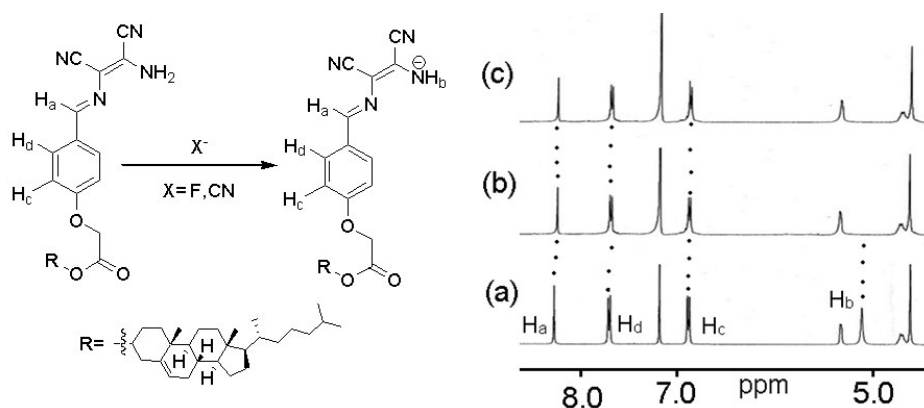

**Fig. S12.** Partial  $^1H$  NMR spectra of **2** ( $c = 5.60 \times 10^{-3}$  M) (a) in absence and in presence of equiv. amount of (b)  $F^-$  and (c)  $CN^-$  in  $CDCl_3$ .

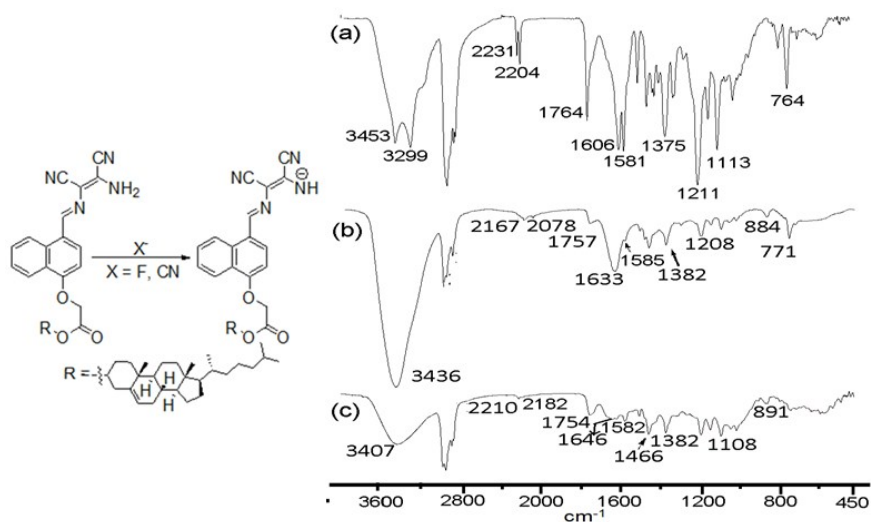

**Fig. S13.** Partial FTIR spectra of (a) **1**, (b) **1** with  $CN^-$  and (c) **1** with  $F^-$ .

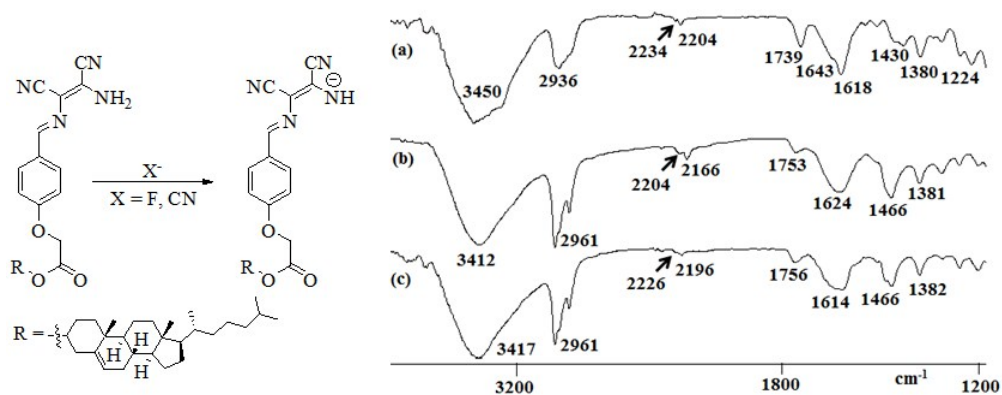

**Fig. S14.** Partial FTIR spectra of (a) **2**, (b) **2** with  $CN^-$  and (c) **2** with  $F^-$ .

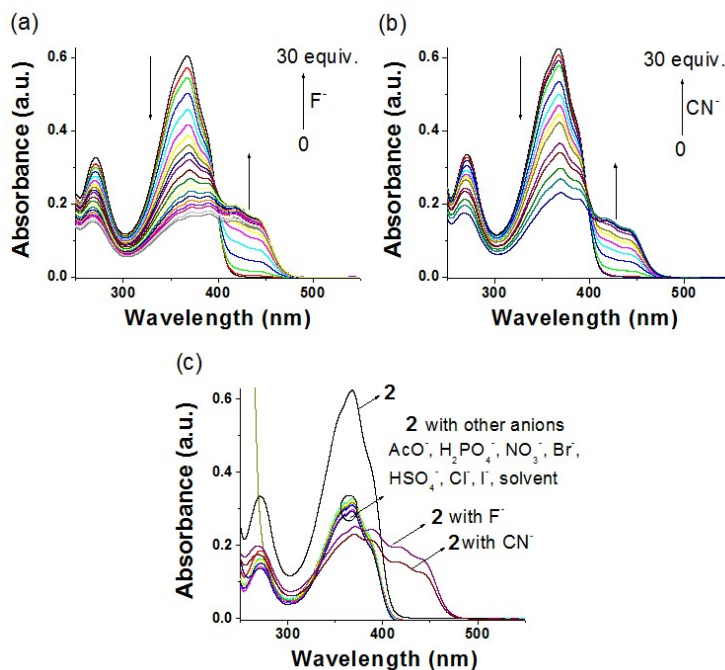

**Fig. S15.** Change in absorbance of **2** (c = 2.50 × 10<sup>-5</sup> M) upon addition of 30 equiv. amounts of (a)  $F^-$ , (b)  $CN^-$  and (c) different anions (c = 1.0 × 10<sup>-3</sup> M) in  $CH_3CN$  containing 1% DMF.

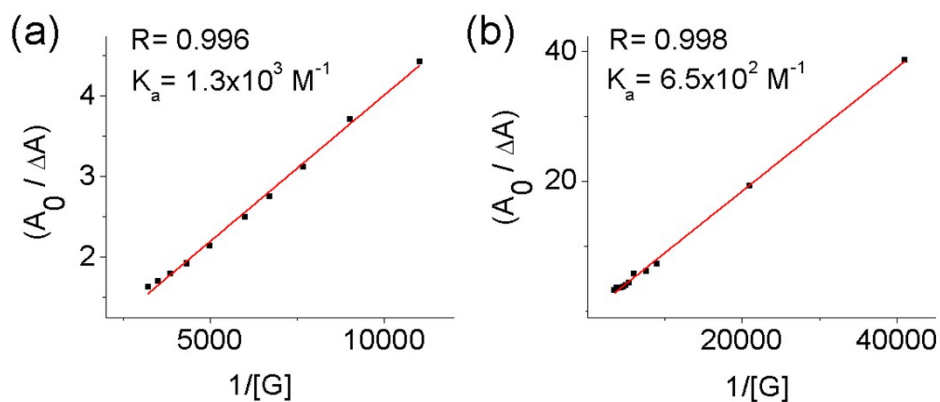

**Fig. S16.** Benesi-Hilderband plot for **1** ( $c = 2.5 \times 10^{-5} \text{ M}$ ) with (a)  $\text{CN}^-$  and (b)  $\text{F}^-$  ( $c = 1.0 \times 10^{-3} \text{ M}$ ) at 390 nm  $\text{CH}_3\text{CN}$  containing 0.5% DMF from UV-vis titration.

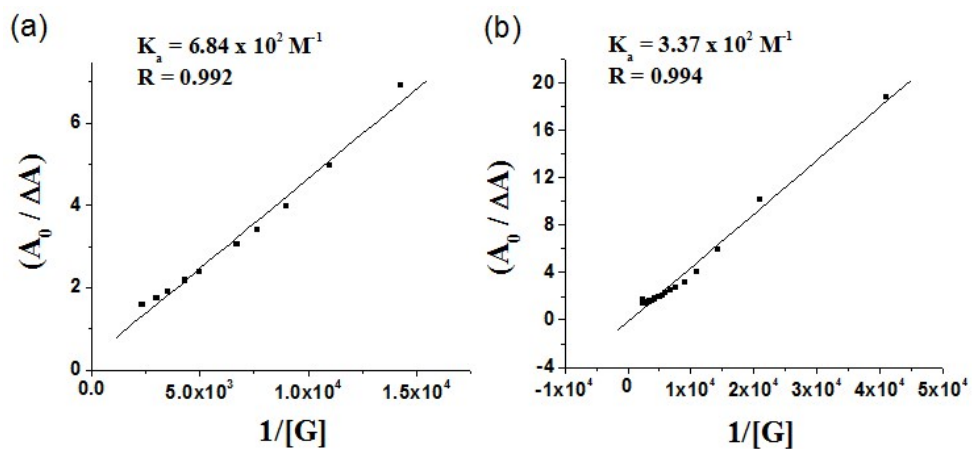

**Fig. S17.** Benesi-Hilderband plot for **2** ( $c = 2.5 \times 10^{-5} \text{ M}$ ) with (a)  $\text{CN}^-$  and (b)  $\text{F}^-$  ( $c = 1.0 \times 10^{-3} \text{ M}$ ) at 366 nm  $\text{CH}_3\text{CN}$  containing 1% DMF from UV-vis titration.

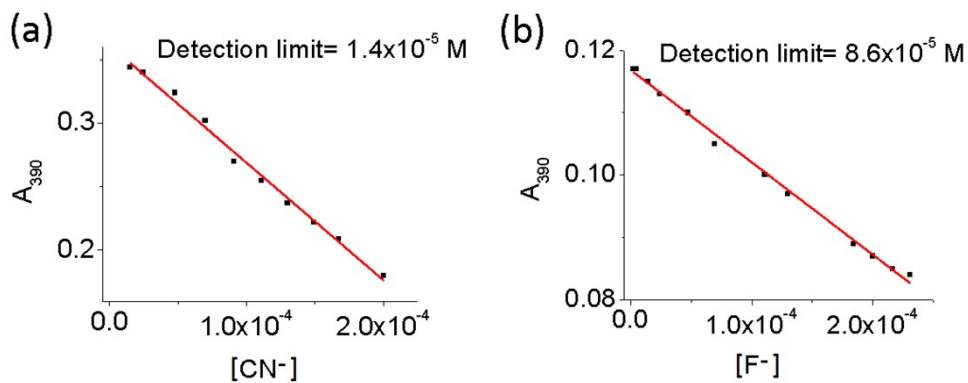

**Fig. S18.** Detection limit of (a)  $\text{CN}^-$  and (b)  $\text{F}^-$  for compound **1** at 390 nm in  $\text{CH}_3\text{CN}$  containing 0.5% DMF from UV-vis titration.

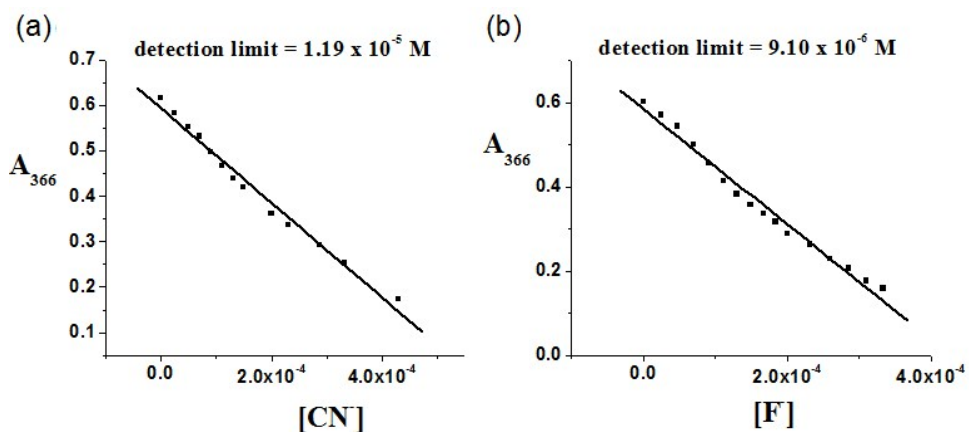

**Fig. S19.** Detection limit of (a)  $\text{CN}^-$  and (b)  $\text{F}^-$  for compound **2** at 366 nm in  $\text{CH}_3\text{CN}$  containing 1% DMF from UV-vis titration.

**Table S2.** Binding constants and detection limit values for the anion-ligand complexes.

| Anion-ligand complex     | Binding constant values ( $\text{M}^{-1}$ ) |  |
|--------------------------|---------------------------------------------|--|
|                          | From UV-vis titration                       |  |
| <b>1</b> – $\text{CN}^-$ | $K = 1.3 \times 10^3$                       |  |
| <b>1</b> – $\text{F}^-$  | $K = 6.5 \times 10^2$                       |  |
| <b>2</b> – $\text{CN}^-$ | $K = 6.84 \times 10^2$                      |  |
| <b>2</b> – $\text{F}^-$  | $K = 3.37 \times 10^2$                      |  |

| Anion ligand complex     | Detection limit values ( $\text{M}$ ) |  |
|--------------------------|---------------------------------------|--|
|                          | From UV-vis titration                 |  |
| <b>1</b> – $\text{CN}^-$ | $1.4 \times 10^{-5}$                  |  |
| <b>1</b> – $\text{F}^-$  | $8.6 \times 10^{-5}$                  |  |
| <b>2</b> – $\text{CN}^-$ | $1.19 \times 10^{-5}$                 |  |
| <b>2</b> – $\text{F}^-$  | $9.10 \times 10^{-6}$                 |  |

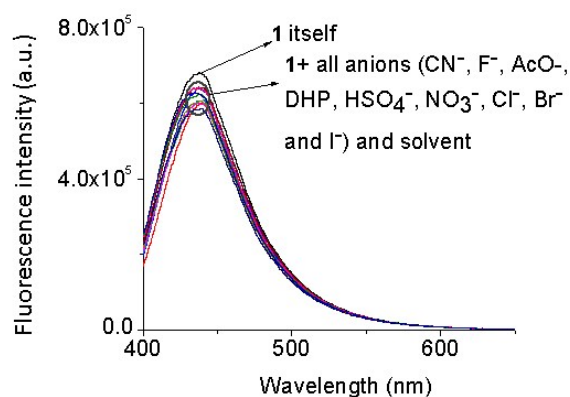

**Fig. S20.** Change in fluorescence intensity ( $\lambda_{\text{ex}} = 390 \text{ nm}$ ) of **1** ( $c = 2.50 \times 10^{-5} \text{ M}$ ) upon addition of 16 equiv. amount different anions ( $c = 1.0 \times 10^{-3} \text{ M}$ ) in  $\text{CH}_3\text{CN}$  containing 0.5% DMF.

**Table S3:** Reported structures for  $\text{CN}^-$  sensing in gel phase.

| Entry | Gelator structure                                   | Detection media       | Sensing mechanism           | solvent                                     | Detection limit (M)                          | Interference from other anions                              | Ref. |
|-------|-----------------------------------------------------|-----------------------|-----------------------------|---------------------------------------------|----------------------------------------------|-------------------------------------------------------------|------|
| 1     |                                                     | Gel-to-sol transition | H-bonding and Deprotonation | DMSO                                        | -                                            | $\text{F}^-$ and $\text{AcO}^-$                             | 2    |
| 2     |                                                     | Gel-to-sol transition | H-bonding and Deprotonation | toluene                                     | -                                            | $\text{F}^-$ and $\text{AcO}^-$                             | 3    |
| 3     |                                                     | Gel-to-gel transition | H-bonding and Deprotonation | $\text{DMSO}:\text{H}_2\text{O}$ (8:2, v/v) | -                                            | $\text{F}^-$ , $\text{AcO}^-$ and $\text{H}_2\text{PO}_4^-$ | 4    |
| 4     | Two component gel from citrazinic acid and melamine | Gel-to-sol transition | H-bonding and Deprotonation | Air dried gel                               | -                                            | $\text{S}^{2-}$                                             | 5    |
| 5     |                                                     | Gel-to-gel transition | Metal Displacement          | DMF                                         | $1.0 \times 10^{-5}$<br>$1.0 \times 10^{-7}$ | -                                                           | 6    |

|           |                                                                                                                                                                                                                                                                   |                       |                             |                                                                                |                                                                             |                |    |
|-----------|-------------------------------------------------------------------------------------------------------------------------------------------------------------------------------------------------------------------------------------------------------------------|-----------------------|-----------------------------|--------------------------------------------------------------------------------|-----------------------------------------------------------------------------|----------------|----|
| 6         | 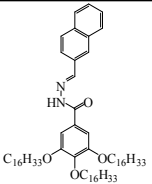                                                                                                                                                                                 | Gel-to-gel transition | Metal Displacement          | EtOH                                                                           | $1.0 \times 10^{-6}$                                                        | -              | 7  |
| 7         | 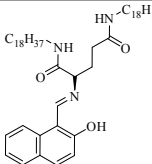                                                                                                                                                                                 | Gel-to-gel transition | Metal Displacement          | DMSO                                                                           | $1.6 \times 10^{-6}$                                                        | -              | 8  |
| 8         | 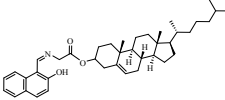                                                                                                                                                                                 | Gel-to-sol transition | Reaction-based              | DMF:H <sub>2</sub> O (2:1, v/v)                                                | $1.36 \times 10^{-5}$                                                       | -              | 9  |
| 9         | 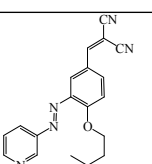                                                                                                                                                                                 | Gel-to-sol transition | Reaction-based              | CH <sub>3</sub> CN                                                             | $9.36 \times 10^{-6}$                                                       | -              | 10 |
| 10        | 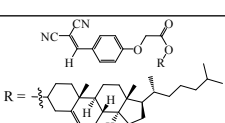                                                                                                                                                                                 | Gel-to-sol transition | Reaction-based              | Toluene-CH <sub>3</sub> OH (1:2, v/v)                                          | $4.17 \times 10^{-6}$ (in CH <sub>3</sub> CN)                               | -              | 3  |
| 11        | 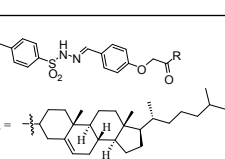                                                                                                                                                                                | Gel-to-sol transition | H-bonding and Deprotonation | DMSO:H <sub>2</sub> O (1:1, v/v)                                               | $7.96 \times 10^{-5}$                                                       | F <sup>-</sup> | 11 |
| This work | 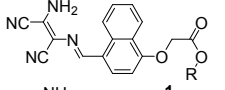<br>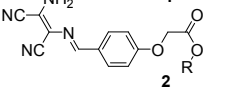<br>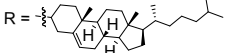 | Gel-to-sol transition | H-bonding and Deprotonation | 1a) toluene<br>1b) CH <sub>3</sub> CN<br><br>2a) DCB<br>2b) CH <sub>3</sub> CN | 1a) -<br>1b) $1.4 \times 10^{-5}$<br><br>2a) -<br>2b) $1.19 \times 10^{-5}$ | F <sup>-</sup> | -  |

**Table S4:** Reported structures of diaminomalenonitrile-based anion-sensors.

| Entry     | Gelator structure                                                                                                                                                                                    | Detection media       | solvent                                                                    | Detection limit (M)                                                             | Responsiveness  | Interference from other anions | Ref. |
|-----------|------------------------------------------------------------------------------------------------------------------------------------------------------------------------------------------------------|-----------------------|----------------------------------------------------------------------------|---------------------------------------------------------------------------------|-----------------|--------------------------------|------|
| 1         | 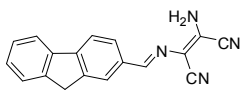                                                                                                                    | Solution              | DMF:H <sub>2</sub> O (4:1, v/v)                                            | 16nM                                                                            | CN <sup>-</sup> | F <sup>-</sup>                 | 12   |
| 2         | 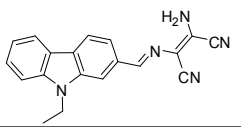                                                                                                                    | Solution              | DMF                                                                        | 98nM                                                                            | F <sup>-</sup>  | -                              | 12   |
| 3         | 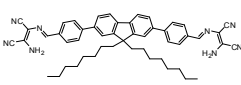                                                                                                                    | Solution              | DMSO:HEPS buffer (1:4 v/v)                                                 | 6.25 × 10 <sup>-6</sup>                                                         | CN <sup>-</sup> | -                              | 13   |
| 4         | 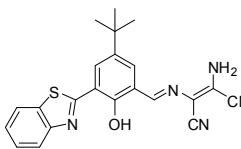                                                                                                                   | Solution              | DMF:H <sub>2</sub> O (1:1, v/v)                                            | 0.16 μM                                                                         | CN <sup>-</sup> | -                              | 14   |
| This work | 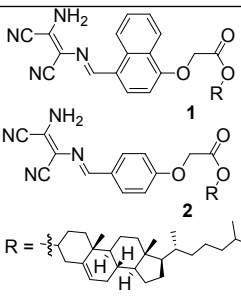 <p>1</p> <p>2</p> <p>R = 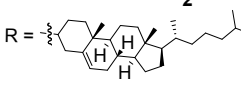</p> | Gel-to-sol transition | 1a) toluene<br>1b) CH <sub>3</sub> CN<br>2a) DCB<br>2b) CH <sub>3</sub> CN | 1a) –<br>1b) 1.4 × 10 <sup>-5</sup> M<br>2a) –<br>2b) 1.19 × 10 <sup>-5</sup> M | CN <sup>-</sup> | F <sup>-</sup>                 | -    |

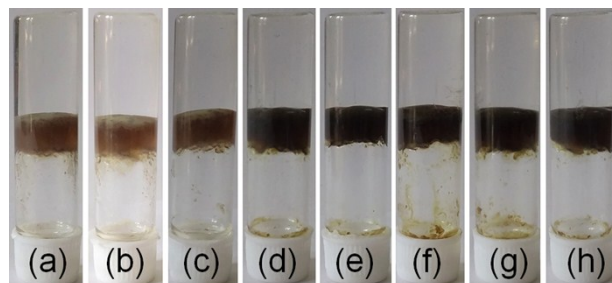

**Fig. S21.** Phase-selective gelation of **2** from biphasic mixture of water and (a) petroleum ether, (b) hexane, (c) cyclohexane, (d) petrol, (e) diesel, (f) kerosene, (g) Pump oil and (h) silicon oil

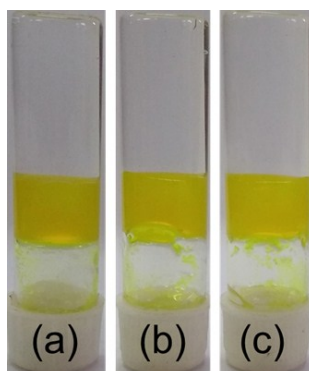

**Fig. S22.** Phase-selective gelation of **1** from toluene/water mixture in presence of (a) NaCl and from different water source (b) tap water and (c) river water.

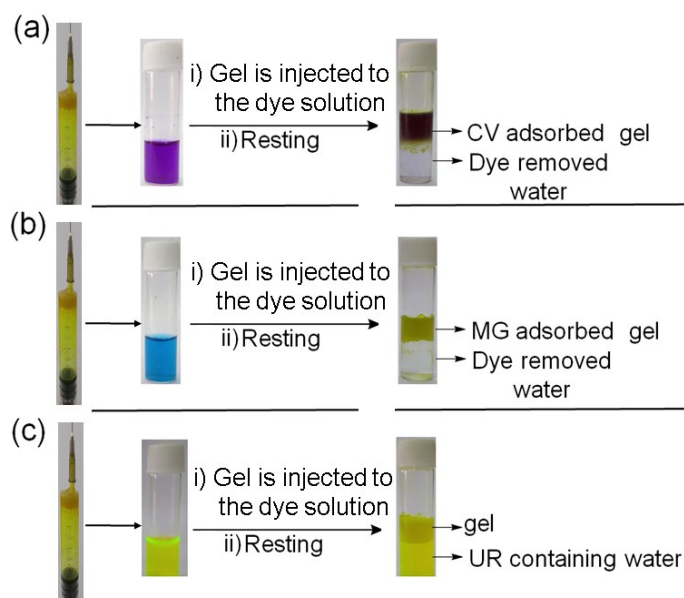

**Fig. S23.** Photograph showing the adsorption of (a) Crystal Violet (CV), (b) Malachite Green (MG), (c) Uranine (UR) when toluene gel of **1** (10 mg/mL) was injected to different dye solutions. In all cases, [dye] =  $3.5 \times 10^{-5}$  M.

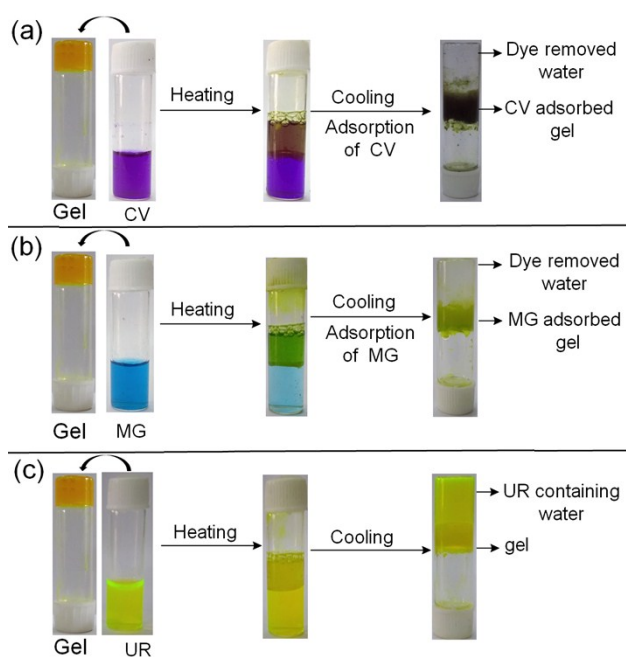

**Fig. S24.** Photograph showing the adsorption of (a) Crystal Violet (CV), (b) Malachite Green (MG), (c) Uranine (UR) by the toluene gel of **1** (10 mg/mL) via heating-cooling method. In all cases, [dye] =  $3.5 \times 10^{-5}$  M.

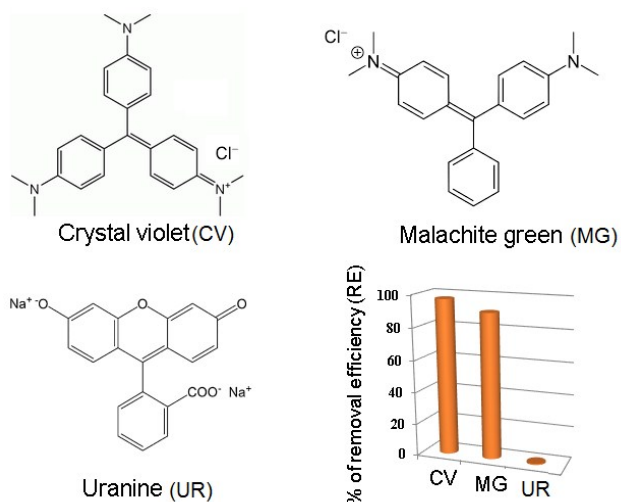

**Fig. S25.** Structures of dyes and the bar plot shows the respective adsorption data.

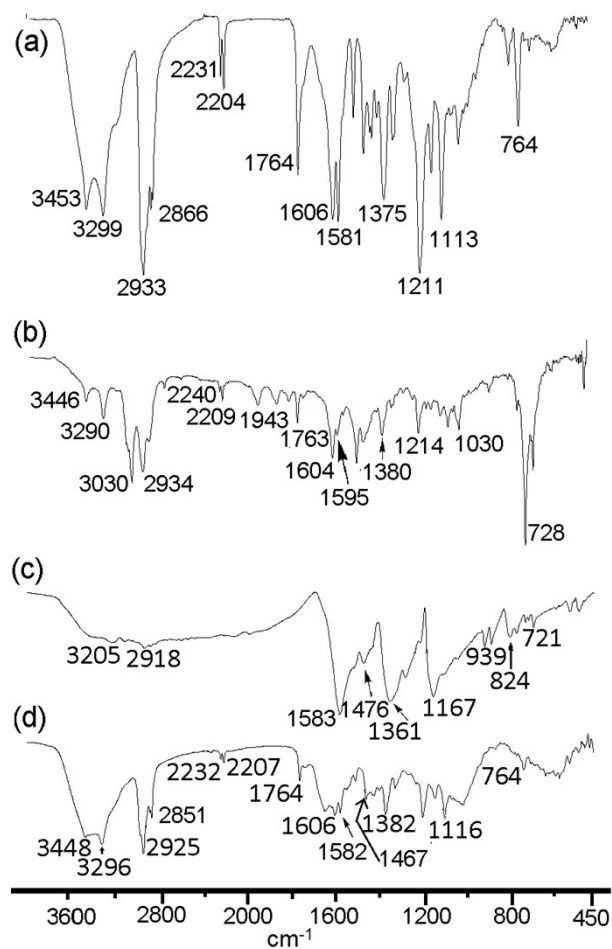

**Fig. S26.** Partial FTIR spectra of (a) **1** (amorphous) (b) toluene gel of **1**, (c) Crystal Violet and (d) Crystal Violet adsorbed gel.

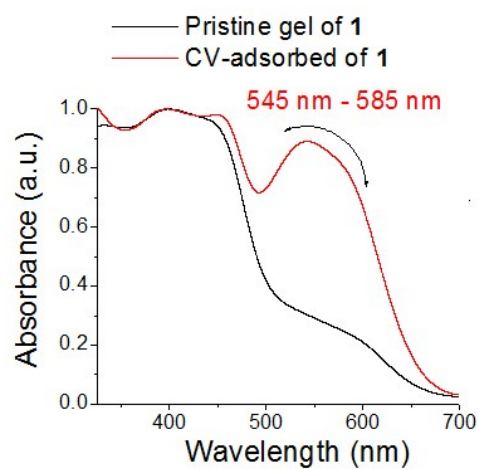

**Fig. S27.** Comparison of normalized UV-vis spectra of the toluene gel of **1** before and after adsorption of Crystal Violet (CV).

**Table S5:** Reported structures of supramolecular gelators applied in dye adsorption.

| Entry | Gelator Structure                                                                                                                                                               | Dye removed                                                                                                        | % of dye removed             | Time Taken                | Ref. |
|-------|---------------------------------------------------------------------------------------------------------------------------------------------------------------------------------|--------------------------------------------------------------------------------------------------------------------|------------------------------|---------------------------|------|
| 1.    | 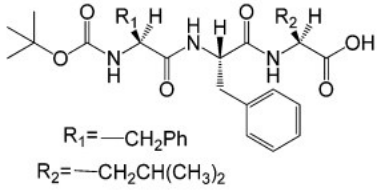 <p> <math>R_1 = -CH_2Ph</math><br/> <math>R_2 = -CH_2CH(CH_3)_2</math> </p>                   | Rhodamine B<br>(cationic dye)<br><br>Reactive Blue 4<br>(neutral dye)<br><br>Direct red 80<br>(anionic dye)        | 84<br><br>88<br><br>97       | 28h<br><br>30h<br><br>32h | 15   |
| 2.    | 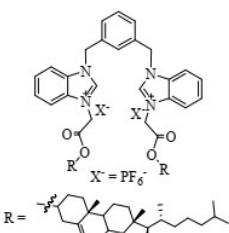 <p> <math>X^- = PF_6^-</math><br/> <math>R =</math> [long branched alkyl chain]         </p>  | Uranine<br>(anionic dye)                                                                                           | 85                           | 24h                       | 16   |
| 3.    | 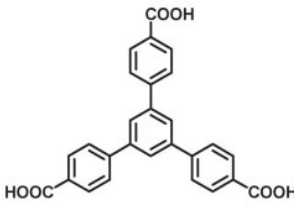                                                                                              | Rhodamine 6G<br>(cationic dye)<br><br>Crystal violet<br>(cationic dye)<br><br>Methylene Blue<br>(cationic dye)     | 82.4<br><br>98.2<br><br>76.1 | 48h                       | 17   |
| 4.    | Ag(I)-melamine polymer hydrogel                                                                                                                                                 | Rose Bengal<br>(neutral dye)                                                                                       | 93                           | 48h                       | 18   |
| 5.    | 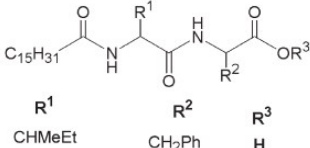 <p> <math>R^1 = CHMeEt</math><br/> <math>R^2 = CH_2Ph</math><br/> <math>R^3 = H</math> </p> | Crystal Violet<br>(cationic dye)                                                                                   | 97                           | 24h                       | 19   |
| 6.    | 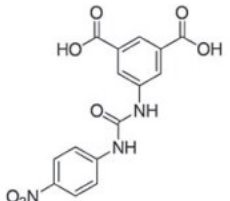                                                                                             | Methylene Blue<br>(cationic dye)<br>Methyl Violet 2B<br>(cationic dye)<br><br>1-Pyrenemethylamine<br>(neutral dye) | 98<br>97<br><br>62           | 48h                       | 20   |
| 7.    | 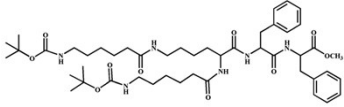                                                                                             | Crystal Violet<br>(cationic dye)                                                                                   | >95                          | 10h                       | 21   |

|           |                                                                                                                                                                                         |                                                             |                |                    |    |
|-----------|-----------------------------------------------------------------------------------------------------------------------------------------------------------------------------------------|-------------------------------------------------------------|----------------|--------------------|----|
| 8.        | 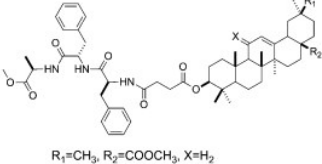 <p><math>R_1 = \text{CH}_3</math>, <math>R_2 = \text{COOCH}_3</math>, <math>X = \text{H}_2</math></p> | Rhodamine 6G<br>(cationic dye)                              | 95             | 24h                | 22 |
| 9.        | 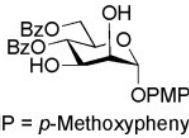 <p>PMP = <i>p</i>-Methoxyphenyl</p>                                                                   | Methyl Violet 2b<br>(cationic dye)                          | 100            | 24h                | 23 |
| 10.       | 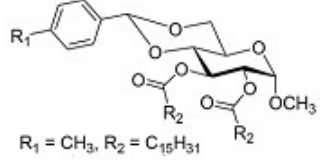 <p><math>R_1 = \text{CH}_3</math>, <math>R_2 = \text{C}_{15}\text{H}_{31}</math></p>                  | Crystal Violet<br>Rhodamine B<br>(both cationic dye)        | >97            | 24h                | 24 |
| 11.       | 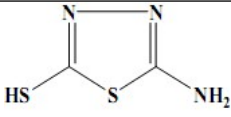 <p>Ag<sup>+</sup>-gel</p>                                                                             | Acid fuchsin<br>(anionic dye)                               | 95             | 4h                 | 25 |
| 12.       | 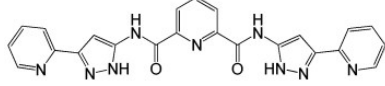 <p>i) Ag<sup>+</sup>-gel, ii) Cd<sup>2+</sup>-gel, iii) Pb<sup>2+</sup>-gel</p>                      | Methyl orange<br>(anionic dye)                              | i) 94          | 4h<br>24h<br>5h    | 26 |
| 13.       | 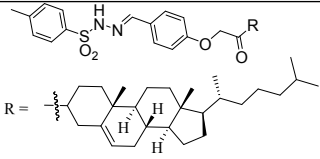 <p><math>R =</math> [structure of a complex molecule]</p>                                           | Erythrosine B<br><br>Uranine<br>(both anionic dye)          | 83<br><br>82   | 2h                 | 11 |
| This work | 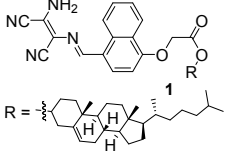 <p><b>1</b></p> <p><math>R =</math> [structure of a complex molecule]</p>                           | Crystal Violet<br><br>Malachite Green<br>(both anionic dye) | >97<br><br>>90 | Within a<br>minute | -  |

**<sup>1</sup>H NMR (CDCl<sub>3</sub>, 400 MHz)**

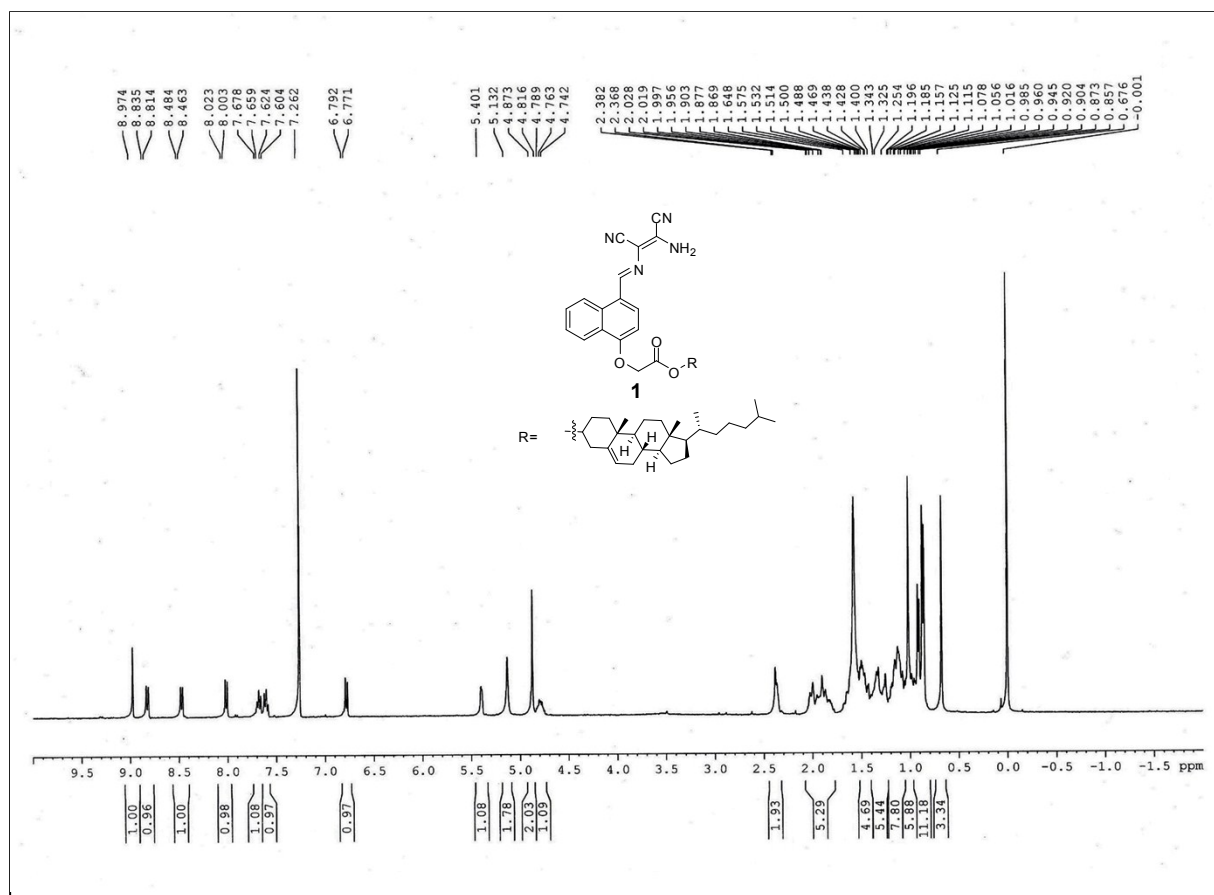

**$^{13}\text{C}$  NMR ( $\text{CDCl}_3$  containing  $40\mu\text{L}$   $d_6$ -DMSO, 400 MHz)**

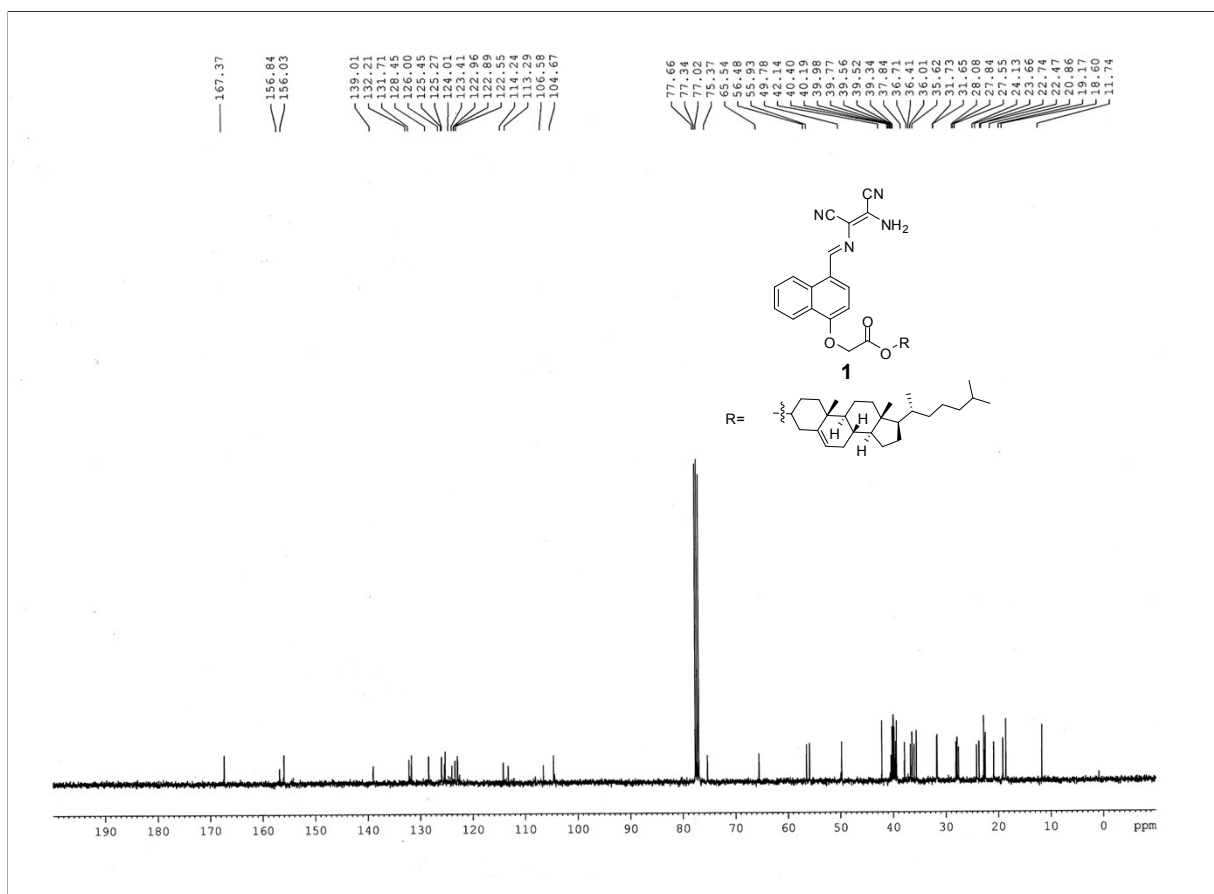

## Mass spectrum of 1.

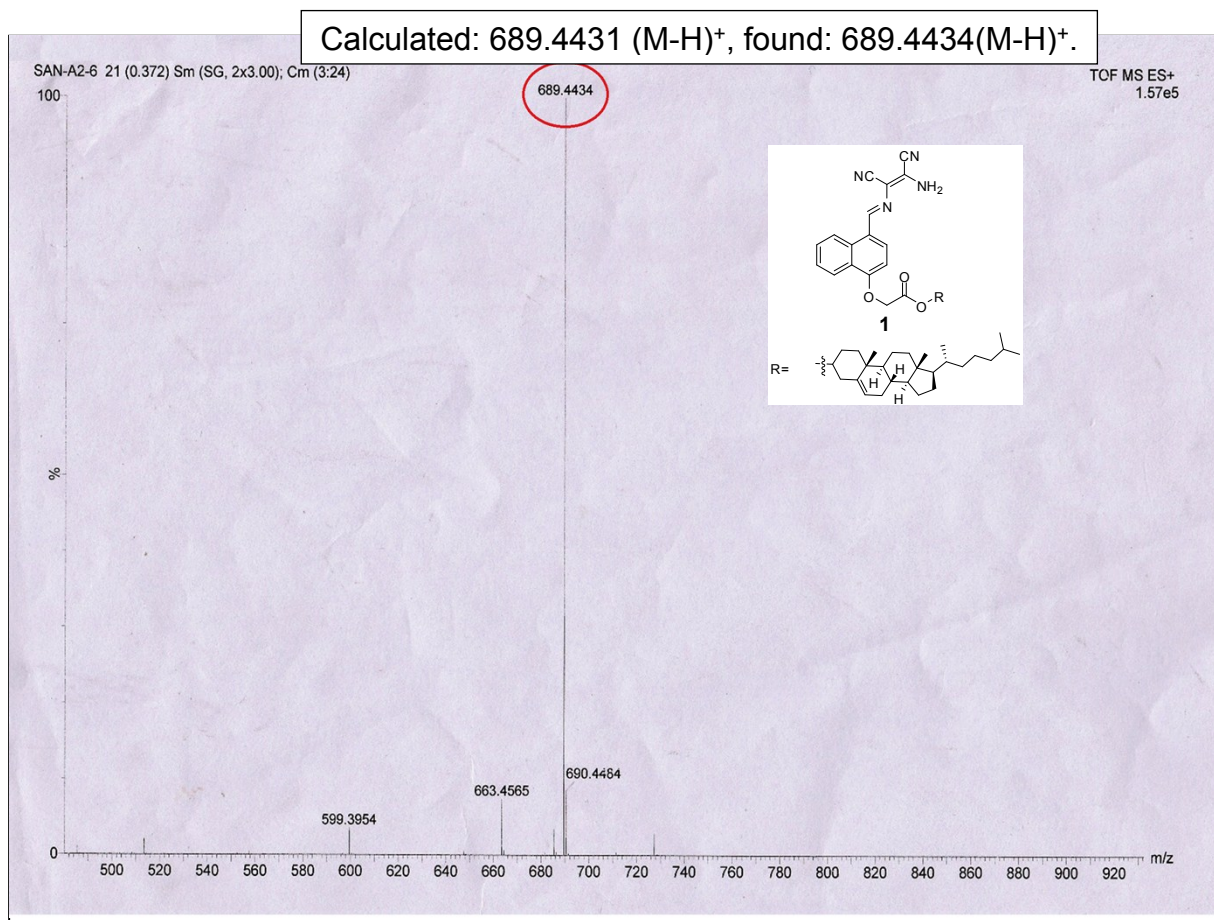

**$^1\text{H}$  NMR ( $\text{CDCl}_3$ , 400 MHz)**

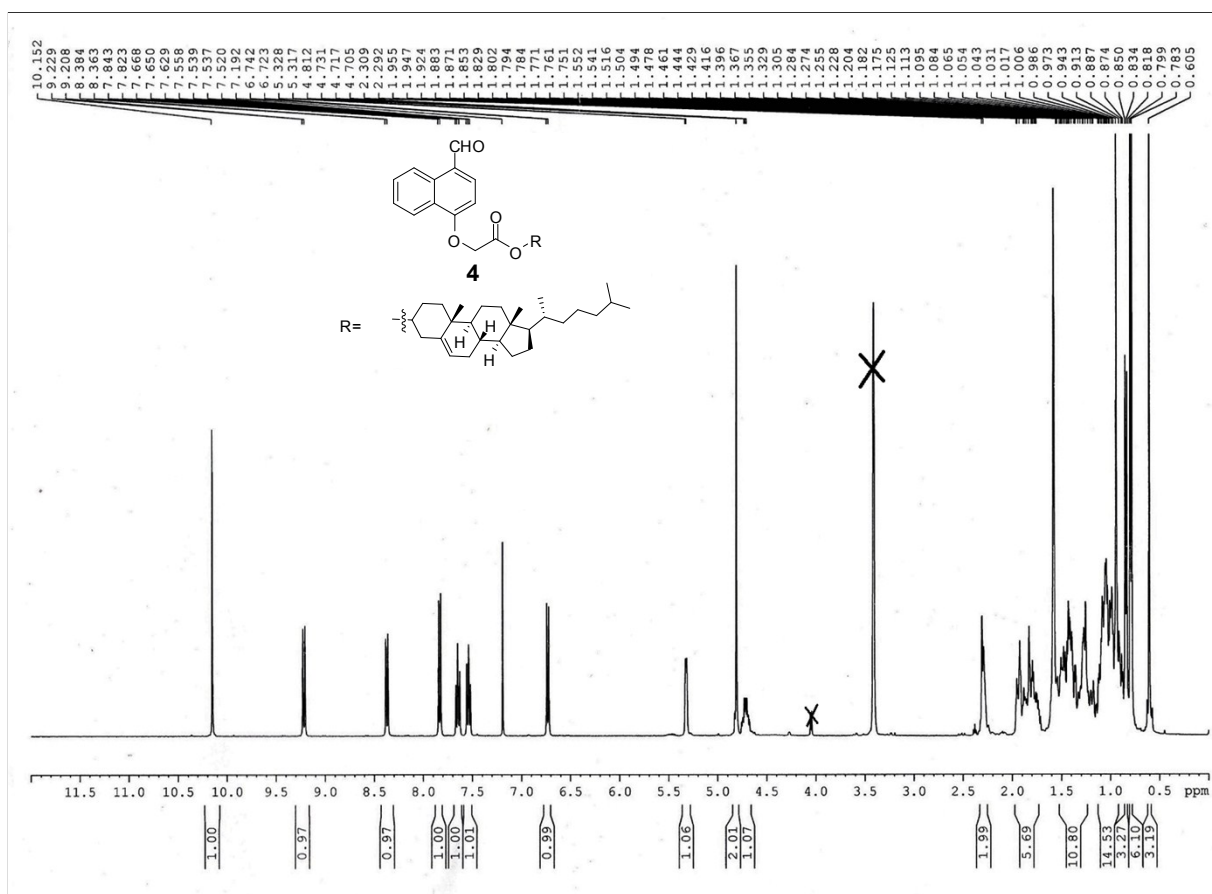

**$^{13}\text{C}$  NMR (CDCl<sub>3</sub>, 400 MHz)**

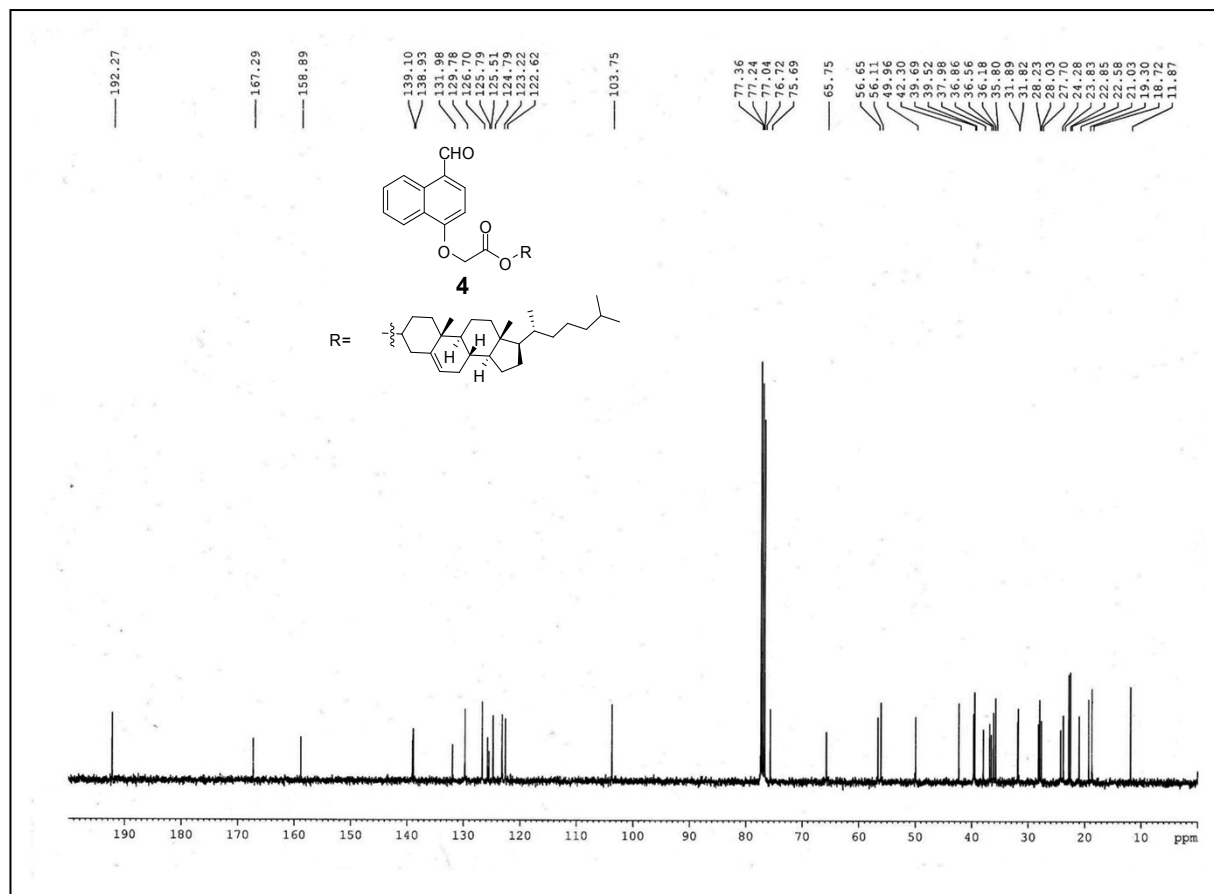

## References

1. A. Panja and K. Ghosh, *New. J. Chem.*, 2018, **42**, 13718-13725.
2. K. Ghosh and C. Pati, *Tetrahedron Lett.*, 2016, **57**, 5469-5474.
3. A. Panja and K. Ghosh, *Supramol. Chem.*, 2019, **31**, 239-250.
4. A. Ghosh, P. Das, R. Kaushik, K. K. Damodaran and D. A. Jose, *RSC Adv.*, 2016, **6**, 83303-83311.
5. S. Sarkar, S. Dutta, C. Ray, B. Dutta, J. Chowdhury and T. Pal, *Cryst.Eng.Comm.*, 2015, **17**, 8119-8129.
6. Q. Lin, B. Sun, Q. P. Yang, Y. P. Fu, X. Zhu, T. B. Wei and Y. M. Zhang, *Chem. Eur. J.*, 2014, **20**, 11457-11462.
7. Q. Lin, T. T. Lu, X. Zhu, B. Sun, Q. P. Yang, T. B. Wei and Y. M. Zhang, *Chem. Commun.*, 2015, **51**, 1635-1638.
8. J. Sun, Y. Liu, L. Jin, T. Chen and B. Yin, *Chem. Commun.*, 2016, **52**, 768-771.
9. K. Ghosh and S. Panja, *Supramol. Chem.*, 2017, **29**, 350-359.
10. A. Panja and K. Ghosh, *Chemistry Select*, 2018, **3**, 1809-1814.
11. A. Panja, S. Ghosh and K. Ghosh, *New. J. Chem.*, 2019, **43**, 10270-10277.
12. S. Sarveswari, A. J. Beneto and A. Siva, *Sens. Actuators, B.*, 2017, **245**, 428-434.
13. M. J. Kim, R. Manivannan, I. J. Kim, and Y. A. Son, *Sens. Actuators, B.*, 2017, **253**, 942-948.
14. K. Keshav, P. Torawane, M. K. Kumawat, K. Tayade, S. K. Sahoo, R. Srivastava and A. Kuwar, *Biosens. Bioelectron.*, 2017, **92**, 95-100.
15. B. Adhikari, G. Palui and A. *Soft Matter*, 2009, **5**, 3452-3460.
16. S. Panja, S. Bhattacharya and K. Ghosh, *Langmuir*, 2017, **33**, 8277-8288.
17. P. K. Sukul and S. Malik, *RSC Adv.*, 2013, **3**, 1902-1915.
18. P. Bairi, B. Roy and A. K. Nandi, *J. Mater. Chem.*, 2011, **21**, 11747-11749.
19. T. Kar, S. Debnath, D. Das, A. Shome and P. K. Das, *Langmuir*, 2009, **25**, 8639-8648.
20. F. R. Llansola, B. Escuder, J. F. Miravet, D. H. Merino, I. W. Hamley, C. J. Cardin and W. Hayes, *Chem. Commun.*, 2010, **46**, 7960-7962.
21. T. Kar, S. Mukherjee and P. K. Das, *New J. Chem.*, 2014, **38**, 1158-1167.
22. J. Lu, Y. Gao, J. Wua and Y. Ju, *RSC Adv.*, 2013, **3**, 23548-23552.
23. K. B. Pal and B. Mukhopadhyay, *ChemistrySelect*, 2017, **2**, 967-974.
24. X. Zhang, J. Song, W. Ji, N. Xu, N. Gao, X. Zhang and H. Yu, *J. Mater. Chem. A.*, 2015, **3**, 18953-18962.
25. Y. Cheng, Q. Feng, M. Yin, X. Ren, J. Wang and Y. H. Zhou, *New J. Chem.*, 2016, **40**, 9125-9131.
26. (a) S. Sengupta, A. Goswami and R. Mondal, *New. J. Chem.*, 2014, **38**, 2470-2479; (b) S. Sengupta and R. Mondal, *J. Mater. Chem. A.*, 2014, **2**, 16373-16377.
